# Supplementary material
Source: PubMed Central journal article supplement (PMC4475896)
Supplement: AEM.00359-15_zam999116350so1.pdf [file AEM.00359-15_zam999116350so1.pdf]

***Cronobacter malonaticus* CQ7, an isolate cultured from powdered infant formula environment, multi-locus sequence type**

**>atpD-27**

GAGCCGCCGGGAAACCGTCTGCGCGTTGCGCTGACCGGCCTGACCATGGCGG  
AGAAATTCCGTGACGAAGGTCGTGACGTTCTGCTGTTTCGTGACAACATCTACC  
GTTACACCCTGGCCGGTACTGAAGTATCCGCACTGCTGGGCCGTATGCCTTCA  
GCGGTAGGTTACCAGCCGACCCTGGCGGAAGAGATGGGCGTTCTGCAGGAGC  
GTATCACCTCCACAAAACCGGTTCTATCACCTCCGTACAGGCGGTATACGTAC  
CGGCGGATGACTTGACTGACCCGTACCAGCCACCACCTTTGCGCACCTTGAC  
GCAACCGTGGTACTGAGCCGTACAGATCGCGTCTCTGGGTATCTACCCGGCCGT  
TGACCCGCTGGATTCCACC

**>fusA-34**

GGTATCCTGGACGACGGTAAAGATACTCCGGCTGAGCGTCACGCTAGCGATGA  
AGAGCCGTTCTCTGCACTGGCGTTCAAATCGCTACCGACCCGTTTGTGGTAA  
CCTGACGTTCTTCCGCGTGTACTCTGGCGTGGTTAACTCTGGCGATAACCATCCT  
GAACTCCGTGAAATCCGCACGTGAGCGTTTCGGCCGTATCGTACAGATGCACG  
CTAACAAACGTGAAGAGATCAAAGAAGTTCGCGCAGGCGACATCGCTGCGGCT  
ATCGGTCTGAAAGACGTGACCACCGGTGACACGCTGTGTAACCCGGATCACCC  
GATCATTCTGGAGCGCATGGAGTTCCTGAGCCGGTAATCTCTATCGCGGTTGA  
ACCGAAAACCAAAGCTGACCAGGAAAAAATGGGTCTGGCTCTGGGCCGTCTGG  
CTAAAGAAGAC

**>glnS-20**

CGCCTGAATCTGGAATATACGGTGTATGTCCAAGCGTAAGCTGAACCTGCTGGTC  
ACCGATAAGCACGTGCAAGGCTGGGATGACCCGCGTATGCCGACGATTTCCGG  
CCTGCGCCGTCGCGGTTATACCGCCGGATCCATCCGCGAATTCTGCAAACGTA  
TCGGCGTGACCAAACAGGATAACACCGTGGAAATGGCCGCGCTGGAAGCGTGC  
ATTCGCGAAGATCTCAACGAGAACGCGCCGCGCGCCATGGCGGTTATCGATCC  
GGTGAAACTGGTTATCGAAAACCTACCCGCGAGGGCCACAGCGAAATAGTGTCGA  
TGCCTAACCATCCGAACAAACCGGAAATGGGCAACCGCGACGTG

**>gltB**

AACCCGCAGGCGGACGCGGTGCGCGTGAAGATGTGCAACCGGCGAGCGAGC  
TGTTCAAACGCTTTGATACCGCGGCGATGTCTATCGGCGCGCTGAGCCCGGAA  
GCGCATGAGTCGCTGGCGGAGGCGATGAACAGCCTCGGCGGTTTCTCGAACTC  
CGGCGAAGGCGGCGAAGATCCGGCGCGTTACGGCACCAATAAAGTCTCGCGC  
ATTAAGCAGGTGGCCTCCGGCCGCTTCGGCGTAACGCCCGCGTATCTGGTTAA  
CGCCGATGTGATTAGATTAAAGTGGCGCAGGGCGCGAAGCCGGGCGAAGGC  
GGCCAGTTACCTGGCGACAAAGTGACGCCGTACATCGCGCGTCTGCGTTATTC  
GGTGCCGGGCGTGACGCTGATCTCCCGCCGCGCCGACACGATATCTACTCGA  
TTGAAGATCTGGCGCAGCTGATTTTCGACTTAAAACAGGTCAACCCGAAGGCGA  
TGATCTCCGTGAAGCTGGTGTCTGAGCCGGGC

**>gyrB**

AAAGATATCGTCGTGACTATCCATGCCGACAACCTCCGTCTCGGTATCGGATGAC  
GGGCGCGGCATTCCGACCGGTATCCATCCGGAAGAGGGCGTGTGCGCGGCGG  
AAGTTATCATGACCGTGCTGCACGCGGGCGGTAAATTCGATGATAACTCCTATA  
AAGTCTCCGGTGGCCTGCACGGCGTAGGCGTCTCTGTGGTTAACGCCCTGTCC  
CAGAACTGGAGCTGGTGATTCGCCGCGAAGGCAAATCCATCAGCAGACTTA  
CGTGACGGCGTGCCGCAAGCGCCGCTGGCGGTGACCGGCGATAACCGATCAG  
ACCGGTAICTAGGTCCGTTTCTGGCCGAGCCTTGAAACCTTCACCAACGTCACT  
GAATTTGAATATGAGATCCTGGCGAAGCGCCTGCGCGAACTCTCATTCTCAAT

TCCGGCGTTTCTATTCGTCTGGTTCGATAAACGCGACGGCAAGCAGGATCACTTC  
CATTACGAAGGCGGCATC

**>infB-75**

GCTTCGGGCGAAGCGGGCGGCATTACCCAGCATATCGGTGCGTACCACGTACA  
GACCGATAACGGCATGATCACCTTCCTGGATACCCCGGGCCACGCCGCGTTTA  
CCGCGATGCGTGCACGTGGTGCAGCAACGGACATCGTGTTCTGGTGGTT  
GCGGCGGACGACGGCGTGATGCCGAGACCATCGAAGCTATCCAGCACGCGA  
AAGCGGCGAAAAGTGCCGGTTGTCGTTGCGGTGAACAAAATCGATAAGCCTGAC  
GCCGATCCGGATCGTGTTAAAAACGAACTGTCTCAGCACGGCATCATCCCGGA  
AGAGTGGGGCGGCGAGAGCCAGTTCGTCCATGTTTCTGCGAAAGCGGGCACC  
GGTATCGATGAACTGCTGGACGCTATCCTGCTGCAGTCCGAAGTTCTGGAAGT  
CACGCGGTACGTAAAGGC

**>pps**

ATGGCAAGCAGGTGCGCATCGAAGATGTGCCGAGGCTGAACGCGACCGTTTC  
TGCATCACGCCGGAAGAAGTGCAGGAACTGGCGAAACAGGCCGTACAGATTGA  
GAAACACTATGGCCGCCCGATGGATATCGAGTGGGCTAAAGACGGCCACACCG  
GCAAGCTGTTTATCGTGCAGGCGCGCCCGGAAACCGTGCGTTCGCGCGGCCA  
GGTGATGGAGCGCTACACGCTGCATTCCCAGGGCAAAGTCGTGGCCGAAGGC  
CGCGCCATCGGCCACCGCATCGGCGCGGGCACCGTGAAGGTGATCCACGACA  
TCAGCGAGATGAACCGCATTACGCCTGGCGATGTGCTGGTCACCGACATGACC  
GACCCGGACTGGGAACCGATCATGAAAAAGCGGCGGCGATTGTCACCAACCG  
CGGCGGGCGCACCTGTCACGCGGGCATCATCGCCCGCGAGCTGGGCATTCCG  
GCGGTGGTCCGGCTGCGGGCGAC
